February 2014

# PSYCHIATRIC SERVICES

A Journal of the  
American Psychiatric  
Association

- ◆ Buprenorphine and Methadone: Rating the Evidence
- ◆ Factors Contributing to Underuse of Clozapine: A State-Level Analysis
- ◆ Illness Management and Recovery: Two Decades of Research
- ◆ Workforce Diversity in Mental Health Care: Measuring Progress

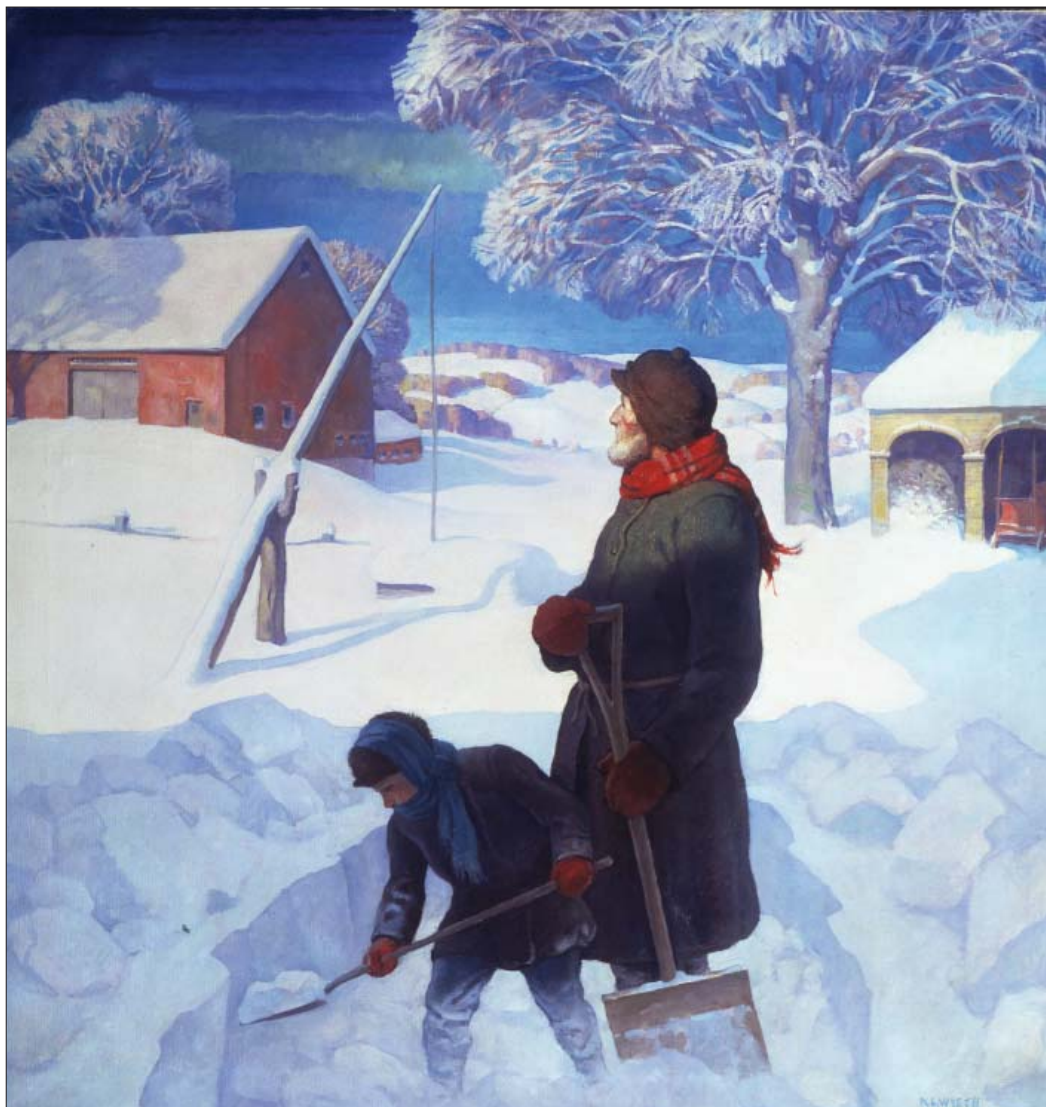

Source: https://psychiatryonline.org/doi/suppl/10.1176/ps.2014.65.issue-2/suppl_file/cover.pdf
